# 1 Novel Approach to Advance Directive Training: Palliative 2 Fellow Led Workshop Feasible and Effective in Increasing 3 Confidence in End of Life Conversations.

4  
5 Chang Chelsea M.D.<sup>1</sup>, Jose Cano M.D.<sup>2</sup>, Juan Lopez-Alvarenga, MD.<sup>3</sup>, Josenny Rodriguez-Paez M.D.<sup>4</sup>, Sonya  
6 Montes, M.D.<sup>5</sup>, Meghana Rao M.D.<sup>6</sup>

7 1. Associate Professor Internal Medicine, Division of Primary and Preventive Care, School of Medicine University of Texas  
8 Rio Grande Valley, McAllen, Texas, United States of America.

9 2. Assistant Professor Family Medicine, Division of Primary and Preventive Care, School of Medicine University of Texas  
10 Rio Grande Valley, McAllen, Texas, United States of America. E Mail: [jose.cano@utrgv.edu](mailto:jose.cano@utrgv.edu)

11 3. Associate Professor of Population Health and Biostatistics, Division of Primary and Preventive Care, School of Medicine  
12 University of Texas Rio Grande Valley, McAllen, Texas, United States of America. Email : [juan.lopezalvarenga@utrgv.edu](mailto:juan.lopezalvarenga@utrgv.edu)

13 4. Internal Medicine Resident, Division of Primary and Preventive Care, University of Texas Rio Grande Valley, School  
14 of Medicine, McAllen, Texas, United States of America. Email : [josenny.rodriguezpaez@utrgv.edu](mailto:josenny.rodriguezpaez@utrgv.edu)

15 5. Internal Medicine Resident, Division of Primary and Preventive Care, University of Texas Rio Grande Valley, School of  
16 Medicine, McAllen, Texas, United States of America. Email : [sonya.montes01@utrgv.edu](mailto:sonya.montes01@utrgv.edu)

17 6. Clinical Associate Professor of Medicine Palliative Care, Stony Brook University Hospital. Stony Brook, New York,  
18 United States of America. Email: [meg22333@gmail.com](mailto:meg22333@gmail.com)

19 Conflict of Interest: The authors declare no conflict of interest with respect to the research, authorship and/or  
20 publication of this article.

21 Financial Disclosure: We have no financial interest or relationships to disclose.

22  
23 \*Corresponding Author. Email: [chelsea.chang@utrgv.edu](mailto:chelsea.chang@utrgv.edu).

24

25

26

27

28

29

30

31

32

33

## Abstract:

Despite the benefits of Advance directives, approximately only 1 in 3 U.S adults have documented advance directives. In medical school and residency, learners are often not taught or given very brief information on conducting end-of-life planning conversations with patients. Due to this deficiency, some institutions have conducted advance directive workshops but not many have been both palliative fellow and resident led, though some have been led by a geriatric fellow. Therefore, we approached advance directives with a resident and palliative fellow-led workshop. We aimed to develop and conduct a workshop on advance directives to assess feasibility and effectiveness. We sent a survey to 52 residents prior to two one-hour didactic sessions. For the first session, a small group of residents discussed common terminology and the tools available to help patients complete advanced directives in the outpatient setting. A hospice and palliative care fellow led the second session and focused on patient communication and approach. Our results showed that the workshop was well-received and improved resident confidence in discussing advance directives with patients. In conclusion, a resident and palliative fellow-led advance directive workshop for internal medicine residents was feasible and effective in increasing resident confidence.

Keywords: Advance Directives, Advance Care Planning, Palliative Care, End-of-life, Education

## 56 Introduction:

57  
58 Despite the benefits of Advance directives, approximately only 1 in 3 of U.S adults have documented advance  
59 directives [1-3]. In medical school and residency, learners are often not taught or given very brief information on  
60 how to conduct end-of-life planning conversations with patients [4-6]. Due to this deficiency, some institutions  
61 have conducted advance directive workshops, but not many have been both resident and palliative care fellow-  
62 led, though some have been led by a geriatric fellow [3,7]. Hospice and Palliative fellows have increased exposure  
63 to encounters related to end-of-life conversations compared to other residents and therefore are an excellent  
64 resource for this needed education[8,9]. We decided to approach advanced directives with a resident and palliative  
65 fellow-led workshop.

66 Advance care planning is a way to help patients and families make important decisions in planning for their future.  
67 It is crucial in end-of-life care and can significantly ease the emotional burden in critical situations. Discussing  
68 advance directives early on has been shown to have better outcomes in families [10-12]. Lack of advance directive  
69 documentation is compounded in the Rio Grande Valley of South Texas, where patient health literacy rates are  
70 low, and discussions regarding end of life are generally avoided in the Hispanic culture, making these  
71 conversations even more challenging [13,14]. These pose barriers to helping patients plan for their future.

72 Palliative care fellows must demonstrate competence in coordinating, leading, and facilitating advance directive  
73 completion. Residents and fellows must also complete a scholarly or quality improvement project during their  
74 programs; therefore, this met educational and patient needs. We reviewed and implemented proven strategies to  
75 change physician behavior and to teach communication skills to physicians to include demonstration and role-  
76 play[15-18]. We aimed to develop and conduct a resident and palliative fellow-led workshop on advance  
77 directives to assess feasibility and effectiveness.

## 80 Methods:

81  
82 We sent a survey to 52 Internal Medicine Residents prior to two one-hour didactic sessions. Our team presented  
83 two one-hour workshops, one resident-led and one palliative fellow-led, aiming to raise resident confidence in  
84 discussing advance directives. A small group of residents discussed common terminology and the tools available  
85 to help patients complete advance directives in the outpatient setting in their lecture hall using a PowerPoint  
86 presentation. The resident presenters discussed the four types of advance directives including medical power of  
87 attorney, reviewed the Texas advance directive document and discussed ways to make the document official.

88 A hospice and palliative care fellow led the second session and focused on patient communication and approach.

89 The fellow-led workshop included the use of prognostication tools such as the Palliative performance scale,  
90 FAST, and ECOG. The fellow presented a PowerPoint including advance directive terminology, prognostication  
91 tools, and a bar graph representation of pre-survey results. The palliative fellow then demonstrated an example of  
92 an advance directive conversation with the help of a resident volunteer, who played the role of a patient.

93 The palliative fellow then instructed the residents to pair up and role-play two provided patient scenarios.

94 Instructions included that they had ten minutes to role-play each scenario, with one resident as a physician and  
95 the other as a patient. They subsequently switched roles for the second scenario. We provided the residents with  
96 prognostication tool handouts and printed scenarios. The first case was NYHA Class IV heart failure, and the

97 second was a case of metastatic cancer. The palliative fellow then conducted a two-minute debriefing session  
98 after each scenario to discuss questions or comments. The palliative fellow then discussed a third Alzheimer's  
99 dementia patient scenario with the group as a whole and followed it up with a post-survey that was identical to  
100 the pre-survey.

101 We used a 5 point Likert agreement scale to assess the residents' level of confidence pre and post-survey. We  
102 conducted a pre and post-test comparison for independent groups using a t-test adjusted for unequal variances.

103 We hypothesized that the workshop would increase residents' knowledge and confidence in advance care planning  
104 discussions. Ethical aspects include that UTRGV IRB determined this project to be exempt.

## Results:

Regarding feasibility, with two faculty mentors, the group of internal medicine residents and fellow were able to develop and lead the two sessions within one academic year. A total of 52 Internal Medicine Residents were invited, 42 (80%) completed the pre survey and 34 (65%) completed the post survey.

The 5 questions with pre and post means are in Table 1 with the Likert Scale of 1 being strongly disagree and 5 strongly agree Table 1. Q1 [I have sufficient knowledge of advance directives, given my years of training] showed a pre-test mean of 3.0 and a post-test mean of 3.8, p-value 0.024. Q2 [I believe my experience with advance directives is adequate for the situations that I routinely encounter] showed a pre-test mean of 3.0 and a post-test mean of 3.9, p-value of <0.001.

**Table 1. Pre and Post Survey of Advance Directive Training**

| Questions                                                                                                            | Pre (n=42)     | Post (n=34)    | p-value |
|----------------------------------------------------------------------------------------------------------------------|----------------|----------------|---------|
| Q.1 I have sufficient knowledge of advance directives, given my years of training.                                   | 3.0 (2.7, 3.3) | 3.8 (3.6, 4.0) | 0.024   |
| Q.2 I believe my experience with advance directives is adequate for the situations that I routinely encounter.       | 3.0 (2.8, 3.3) | 3.9 (3.7, 4.1) | <0.001  |
| Q.3 I am interested in participating in advance directive scenarios should they be offered at the simulation center. | 4.1 (3.8, 4.4) | 4.3 (4, 4.5)   | 0.309   |
| Q.4 Didactic Sessions on advance directives should be offered by my hospital, residency program or medical school.   | 4.5 (4.3, 4.7) | 4.6 (4.3, 4.9) | 0.511   |
| Q.5 Advance directives should only be discussed with patients over 60                                                | 2.1 (1.7, 2.4) | 2.0 (1.5, 2.5) | 0.732   |

Mean values of a 5 point Likert scale with 1 being strongly disagree and 5 strongly agree, with 95% Confidence Interval. The p-values were calculated with adjustment of variance

118 Both perceived knowledge (Q1) and confidence (Q2) had a statistically significant move from a response of  
119 “neutral” (3) to a response of “agree” (4) and are depicted in histograms to show the distribution of responses  
120 improving Figure 1 and 2.

121 **Fig 1. Histogram Post Training Survey.** X axis 5-point Likert scale with 1 being strongly disagree and 5 strongly  
122 agree. Y axis represents N of observations or participants. Right Curve Deviation on Post Test representing improvement  
123 (Observe in the post-training distribution a clear displacement of the curve to the right on the x-axis).

124  
125 **Fig 2. Histogram Post Training Survey.** X axis 5-point Likert scale with 1 being strongly disagree and 5 strongly  
126 agree. Y axis represents N of observations or participants. Right Curve Deviation on Post Test representing improvement  
127 (Observe in the post-training distribution a clear displacement of the curve to the right on the x-axis).

128

129 Resident interest in participating in advance directive simulations and resident agreement that didactics on  
130 advance directives should be offered, both had high agreement pre and post with no statistically significant change  
131 (Q3 and Q4 in Table 1). Q5 assessed knowledge directly with the statement that advance directives should only  
132 be discussed with patients over 60 to which both pre and post means were correct in “disagreeing”, with no  
133 statistically significant change.

134 During the workshops, residents expressed that practicing patient scenarios gave them insight into navigating  
135 these types of conversations and found this method impactful. Residents also verbalized that exposure to  
136 prognostication tools helped in these discussions as well. Residents reported that experiencing both physician and  
137 patient roles also exposed them to the barriers that each position entails in advance directive conversations.

138 Thus, overall, our results showed that the workshop was well-received and improved resident confidence in  
139 discussing advance directives with patients.

140

141

142

## 143 Discussion:

144 Our fellow and resident-led advance directive workshop was feasible as evidenced by completion and effective  
145 as evidenced by pre and post-surveys demonstrating statistically significant increased knowledge and confidence.  
146 The observed high level of resident interest in training, by simulation or didactics, in both pre and post survey  
147 also support the notion that these workshops are needed. Upon reflection of our knowledge-based question  
148 regarding whether to only perform directives in people above 60 years of age, the majority of residents already  
149 knew this statement was incorrect in the pretest, therefore no change was accomplished in posttest. This likely  
150 indicates the question was too simple and did not assess the higher order of knowledge which we were seeking to  
151 impart.

152 A strength of this project is that this model of resident and fellow-led advance directive workshop fills a curricular  
153 gap for internal medicine residents while also satisfying educational requirements for both residents and fellows.  
154 The fellow provided a near-peer teaching environment, and resident leaders appreciated that additional level of  
155 experience and expertise the fellow added. Another strength is overall high pretest completion at 80% with  
156 slightly lower but still above average posttest completion of 65%. Our workshop added to the literature showing  
157 success in resident-led workshops, improved confidence in advance directive discussions after training and was  
158 unique in the involvement of a palliative care fellow[3,7]. Our model may be a tactic to address the deficiency in  
159 end-of-life planning among resident learners at institutions with palliative care fellows and provide a successful  
160 method in bolstering resident confidence in discussing advance directives.

161 Limitations included that survey responses were not matched to individuals which lowered statistical efficiency  
162 in detecting individual changes, surveys were not validated and mostly assessed Kirkpatrick Level 1 Reaction  
163 with a small amount of Kirkpatrick Level 2 Learning on knowledge.



164 Regarding feasibility limitations, we performed the workshop at a single site and implemented it in a single year.  
165 Future studies can include assessing Level 3 Behavior or Level 4 Results such as in effectiveness and frequency  
166 in which residents engage in advance directive discussions.

## 167 Conclusion:

168 Advance care planning plays a pivotal role in end-of-life care. Through our two-session workshop, we improved  
169 resident confidence in discussing end-of-life planning. In conclusion, a resident and palliative fellow-led advance  
170 directive workshop for internal medicine residents was feasible and effective in increasing resident confidence.

## 171 References:

- 172 1.Yadav KN, Gabler NB, Cooney E, Kent S, Kim J, Herbst N, et al. Approximately One In Three US  
173 Adults Completes Any Type Of Advance Directive For End-Of-Life Care. Health Aff (Millwood).  
174 2017;36(7):1244-51.
- 175 2.Prevention CfDCA. . Chronic obstructive pulmonary disease 2016 [May 19, 2017]. Available from:  
176 <http://www.cdc.gov/copd/index.html>.
- 177 3.Detering K, Silvester W, Corke C, Milnes S, Fullam R, Lewis V, et al. Teaching general practitioners  
178 and doctors-in-training to discuss advance care planning: evaluation of a brief multimodality education  
179 programme. BMJ Support Palliat Care. 2014;4(3):313-21.
- 180 4.Vettese T WJ, Thati N. . “Do You Want Us to Do Everything?”: Teaching Residents to Discuss  
181 Resuscitation with Hospitalized Patients. MedEdPORTAL. 2015;11:10122.
- 182 5.Bp V, Mt W, Ee T. A Collaborative educational intervention to improve pre-clinical medical student  
183 confidence with Advance Care Planning (ACP). Gerontol Geriatr Educ. 2021;42(1):71-81.
- 184 6.Chan D, Ward E, Lapin B, Marschke M, Thomas M, Lund A, et al. Outpatient Advance Care Planning  
185 Internal Medicine Resident Curriculum: Valuing Our Patients' Wishes. J Palliat Med. 2016;19(7):734-  
186 45.

- 187 7.Blomberg BA, Quintana C, Hua J, Hargis-Fuller L, Laux J, Drickamer MA. Enhancing Advance Care  
188 Planning Communication: An Interactive Workshop With Role-Play for Students and Primary Care  
189 Clinicians. *MedEdPORTAL*. 2020;16:10973.
- 190 8.Block SD. Medical education in end-of-life care: the status of reform. *J Palliat Med*. 2002;5(2):243-8.
- 191 9.Baile WF, Kudelka AP, Beale EA, Glober GA, Myers EG, Greisinger AJ, et al. Communication skills  
192 training in oncology. Description and preliminary outcomes of workshops on breaking bad news and  
193 managing patient reactions to illness. *Cancer*. 1999;86(5):887-97.
- 194 10.Bernacki RE, Block SD, American College of Physicians High Value Care Task F. Communication  
195 about serious illness care goals: a review and synthesis of best practices. *JAMA Intern Med*.  
196 2014;174(12):1994-2003.
- 197 11.Wright AA, Zhang B, Ray A, Mack JW, Trice E, Balboni T, et al. Associations between end-of-life  
198 discussions, patient mental health, medical care near death, and caregiver bereavement adjustment.  
199 *JAMA*. 2008;300(14):1665-73.
- 200 12.Degenholtz HB, Rhee Y, Arnold RM. Brief communication: the relationship between having a living  
201 will and dying in place. *Ann Intern Med*. 2004;141(2):113-7.
- 202 13.Olney CA, Warner DG, Reyna G, Wood FB, Siegel ER. MedlinePlus and the challenge of low health  
203 literacy: findings from the Colonias project. *J Med Libr Assoc*. 2007;95(1):31-9.
- 204 14.Williams MV, Baker DW, Parker RM, Nurss JR. Relationship of functional health literacy to patients'  
205 knowledge of their chronic disease. A study of patients with hypertension and diabetes. *Arch Intern  
206 Med*. 1998;158(2):166-72.
- 207 15.Davis D, O'Brien MA, Freemantle N, Wolf FM, Mazmanian P, Taylor-Vaisey A. Impact of formal  
208 continuing medical education: do conferences, workshops, rounds, and other traditional continuing  
209 education activities change physician behavior or health care outcomes? *JAMA*. 1999;282(9):867-74.
- 210 16.Sisson SD, Hill-Briggs F, Levine D. How to improve medical education website design. *BMC Med  
211 Educ*. 2010;10:30.

17. Berkhof M, van Rijssen HJ, Schellart AJ, Anema JR, van der Beek AJ. Effective training strategies for teaching communication skills to physicians: an overview of systematic reviews. *Patient Educ Couns*. 2011;84(2):152-62.

18. Prevention CfDca. Introduction to Program Evaluation for Public Health Programs: A Self-Study Guide 2012 [Available from: <https://www.cdc.gov/evaluation/guide/index.htm>].

## Supporting information

**S1 Fig, 1. Fig 1. Histogram Post Training Survey.** X axis 5-point Likert scale with 1 being strongly disagree and 5 strongly agree. Y axis represents N of observations or participants. Right Curve Deviation on Post Test representing improvement (Observe in the post-training distribution a clear displacement of the curve to the right on the x-axis).

**S2 Fig 2. Histogram Post Training Survey.** X axis 5-point Likert scale with 1 being strongly disagree and 5 strongly agree. Y axis represents N of observations or participants. Right Curve Deviation on Post Test representing improvement (Observe in the post-training distribution a clear displacement of the curve to the right on the x-axis).

240

241

242

243

244

Fig 1. Histogram Post Training Survey.

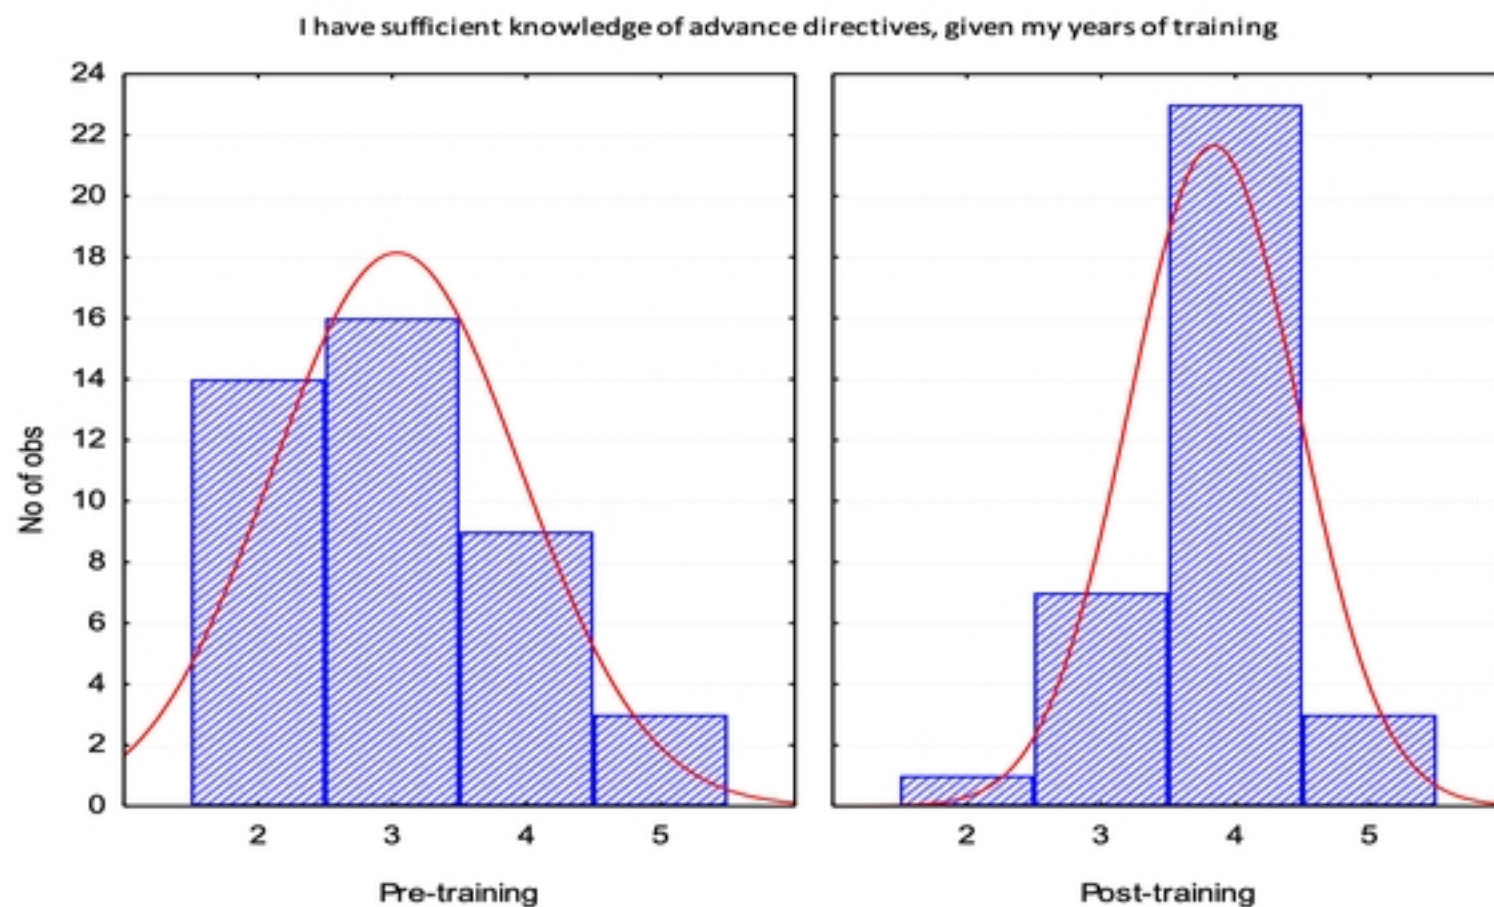

X axis 5-point Likert scale with 1 being strongly disagree and 5 strongly agree. Y axis represents N of observations or participants. Right Curve Deviation on Post Test representing improvement (Observe in the post-training distribution a clear displacement of the curve to the right on the x-axis).

**Fig 2. Histogram Post Training Survey.**

I believe my experience with advance directives is adequate for the situations that I routinely encounter

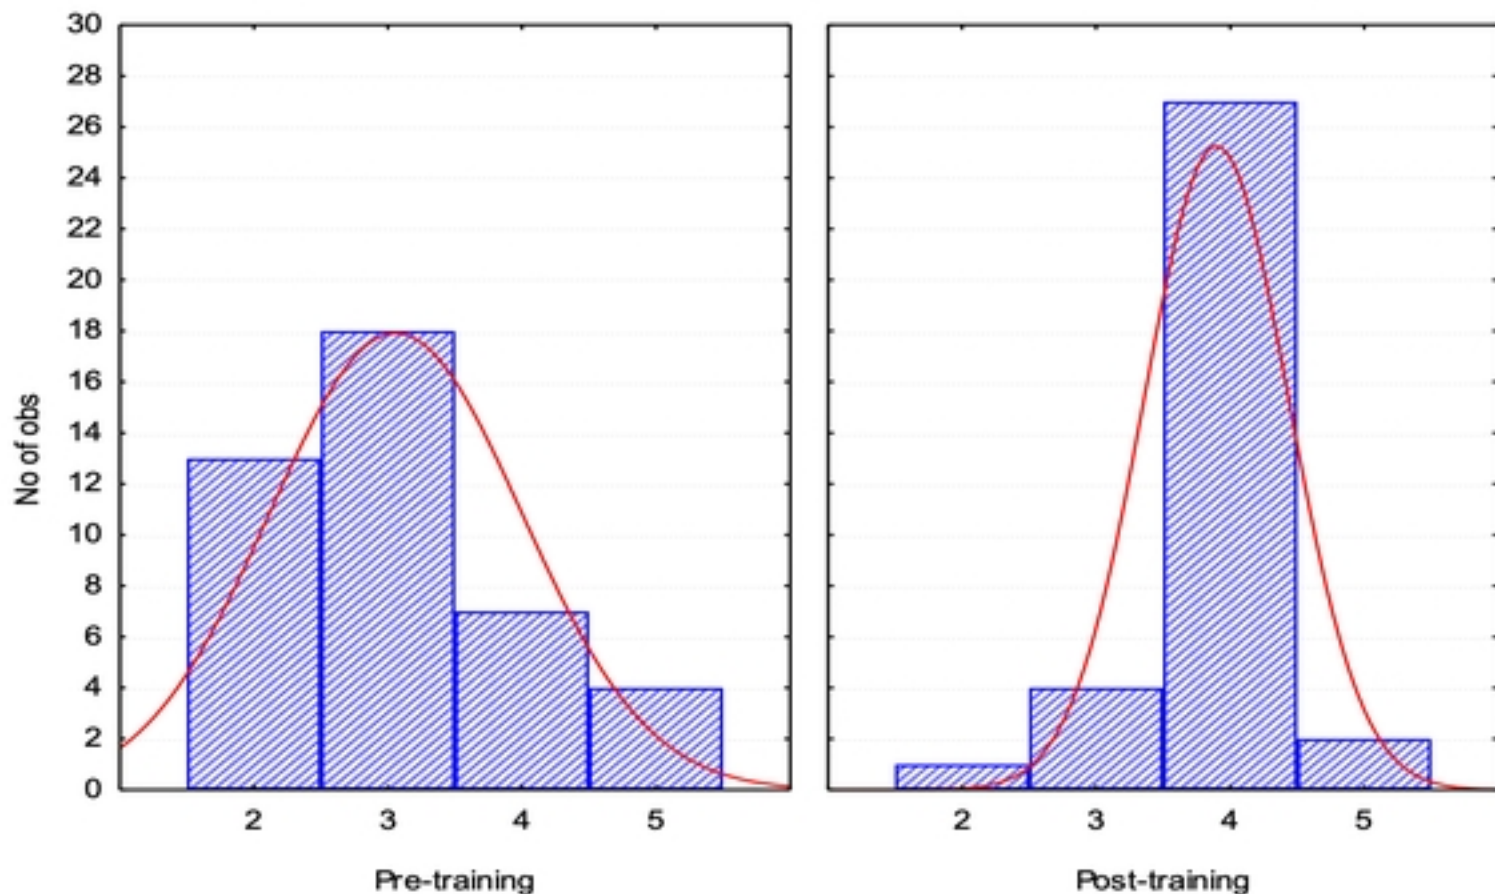

X axis 5-point Likert scale with 1 being strongly disagree and 5 strongly agree. Y axis represents N of observations or participants. Right Curve Deviation on Post Test representing improvement (Observe in the post-training distribution a clear displacement of the curve to the right on the x-axis).
